# Supplementary material for: Direct evidence of a blocking heavy atom effect on the water-assisted fluorescence enhancement detection of Hg2+ based on a ratiometric chemosensor
Source: Royal Society of Chemistry journal article supplement (doi:10.1039/c4dt01310g), 2014-01-01
Supplement: c4dt01310g1.pdf [file c4dt01310g1.pdf]

## Supporting information

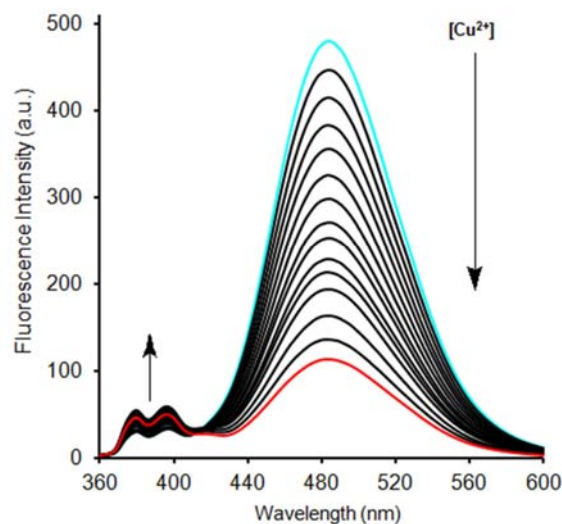

**Figure S1.** Fluorescence spectral of **L** (1.0 μM) upon addition of increasing concentrations of Cu<sup>2+</sup> in CH<sub>3</sub>CN / H<sub>2</sub>O (v/v, 95:5) solution at 298K.  $\lambda_{\text{ex}} = 343$  nm.

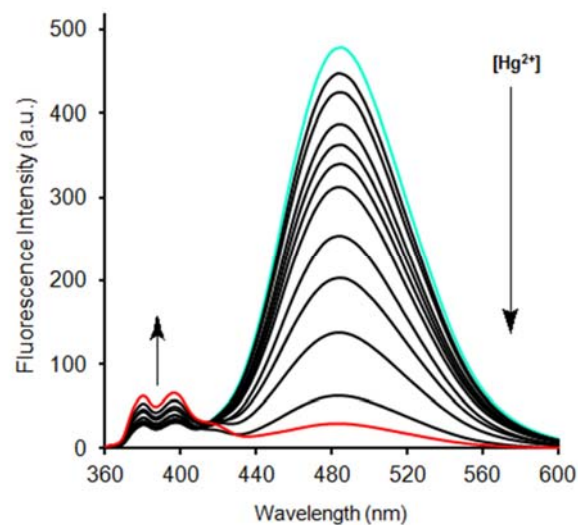

**Figure S2.** Fluorescence spectral of **L** (1.0 μM) upon addition of increasing concentrations of Hg<sup>2+</sup> in CH<sub>3</sub>CN / H<sub>2</sub>O (v/v, 95:5) solution at 298K.  $\lambda_{\text{ex}} = 343$  nm.

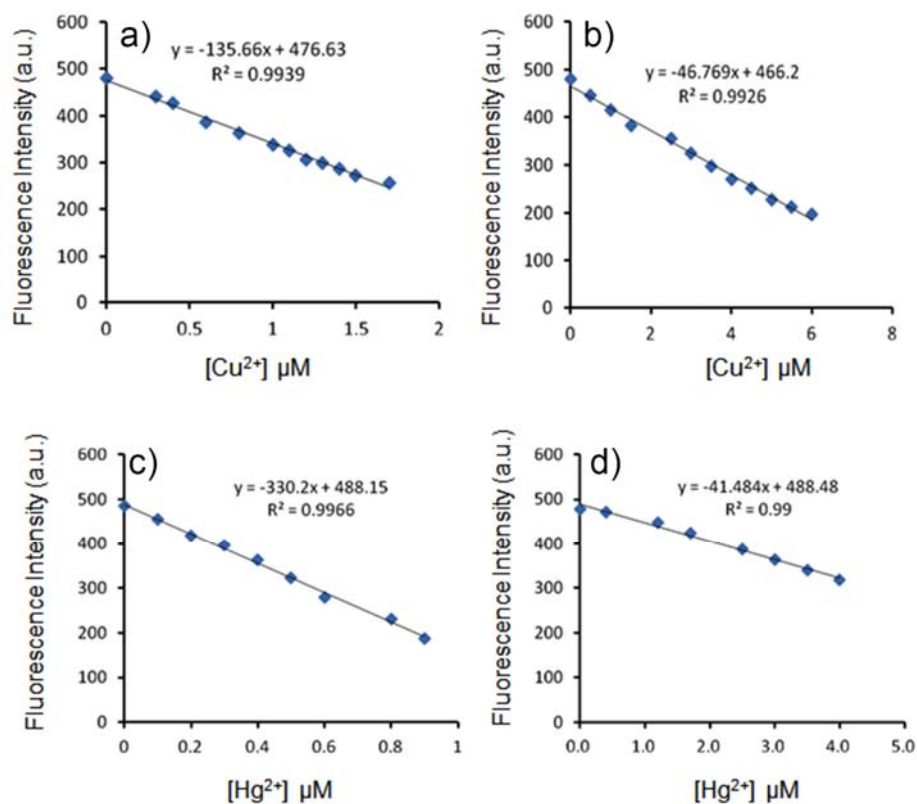

**Figure S3.** Plot of fluorescence intensity change (485 nm) of L with varied concentrations of  $\text{Cu}^{2+}$  and  $\text{Hg}^{2+}$  at 298K, the limit of detection of  $\text{Cu}^{2+}$  was calculated to be a)  $4.54 \times 10^{-9}$  M in  $\text{CH}_3\text{CN}$ , b)  $1.87 \times 10^{-8}$  M in  $\text{CH}_3\text{CN}/\text{H}_2\text{O}$  (v/v, 95:5), and the limit of detection of  $\text{Hg}^{2+}$  was calculated to be c)  $2.64 \times 10^{-9}$  M in  $\text{CH}_3\text{CN}$ , d)  $1.08 \times 10^{-8}$  M in  $\text{CH}_3\text{CN}/\text{H}_2\text{O}$  (v/v, 95:5), by the formula  $(3\sigma/K)$ .

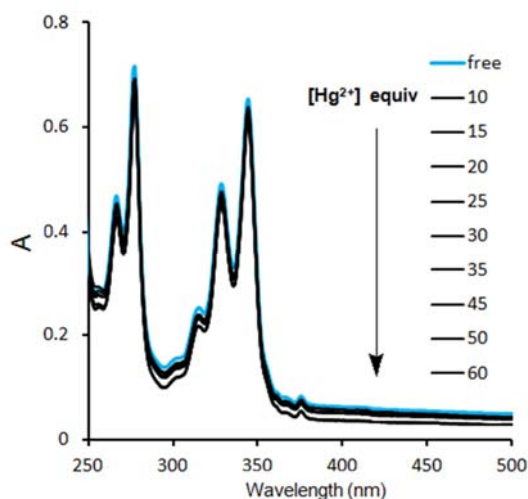

**Figure S4.** UV-vis spectral changes of L (1.0  $\mu\text{M}$ ) in  $\text{CH}_3\text{CN} / \text{H}_2\text{O}$  solution (v/v, 95:5) with increasing concentration of  $\text{Hg}^{2+}$  ions.

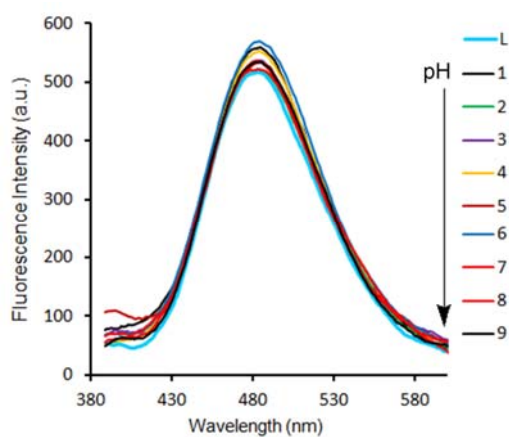

**Figure S5.** Fluorescence spectral changes of **L** ( $1.0 \mu\text{M}$ ) in  $\text{CH}_3\text{CN} / \text{H}_2\text{O}$  (v/v, 95:5) from pH 1.0 to 9.0.  $\lambda_{\text{ex}} = 343 \text{ nm}$ .

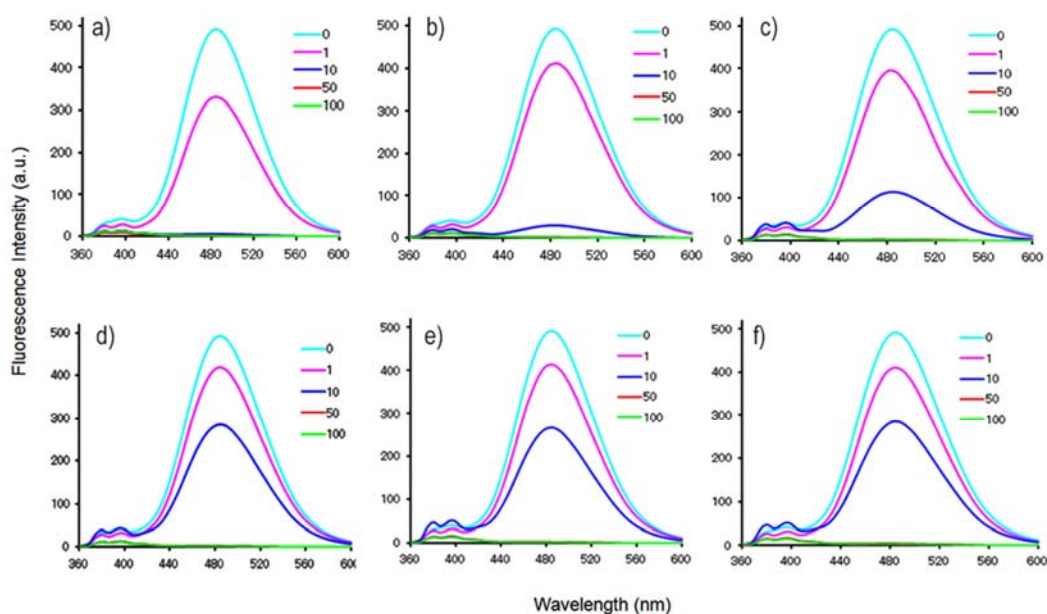

**Figure S6.** Fluorescence spectral changes of **L** ( $1.0 \mu\text{M}$ ) upon addition of different concentrations of  $\text{Hg}(\text{ClO}_4)_2$  (1, 10, 50, 100  $\mu\text{M}$ ) and determined immediately at 298 K in a)  $\text{CH}_3\text{CN}$  solution; b) 1%  $\text{H}_2\text{O}$  ( $\text{H}_2\text{O}/\text{CH}_3\text{CN}$ , v/v); c) 2%  $\text{H}_2\text{O}$  ( $\text{H}_2\text{O}/\text{CH}_3\text{CN}$ , v/v); d) 3%  $\text{H}_2\text{O}$  ( $\text{H}_2\text{O}/\text{CH}_3\text{CN}$ , v/v); e) 4%  $\text{H}_2\text{O}$  ( $\text{H}_2\text{O}/\text{CH}_3\text{CN}$ , v/v); f) 5%  $\text{H}_2\text{O}$  ( $\text{H}_2\text{O}/\text{CH}_3\text{CN}$ , v/v).  $\lambda_{\text{ex}} = 343 \text{ nm}$ .

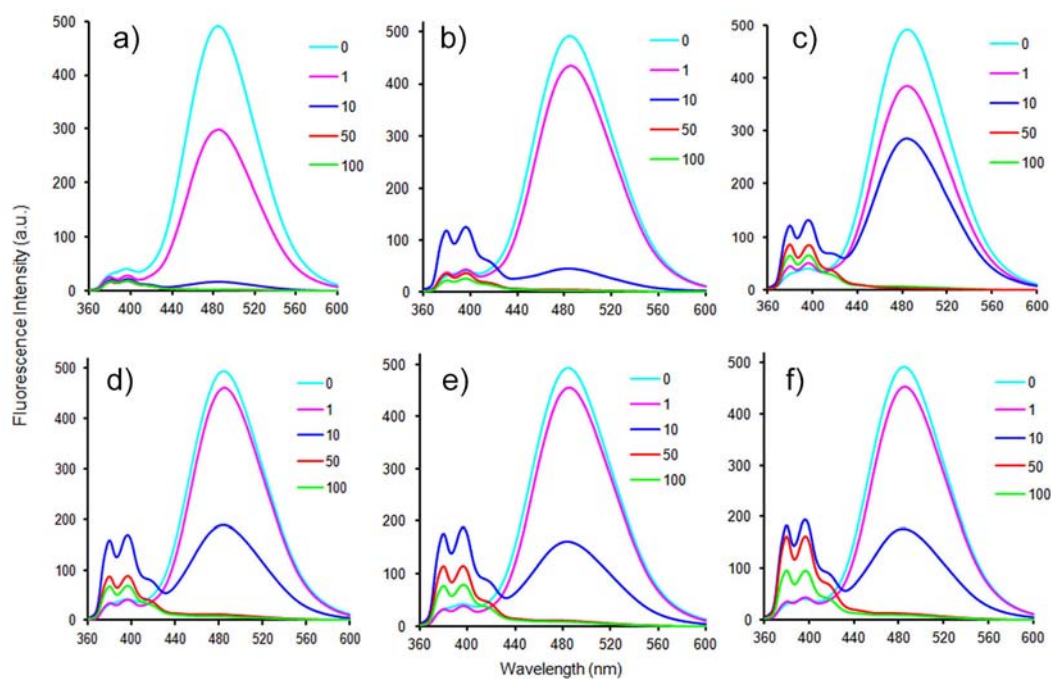

**Figure S7.** Fluorescence spectral changes of **L** (1.0  $\mu\text{M}$ ) upon addition of different concentrations of  $\text{Hg}(\text{ClO}_4)_2$  (1, 10, 50, 100  $\mu\text{M}$ ) and determined after 48 h at 298 K in a)  $\text{CH}_3\text{CN}$  solution; b) 1%  $\text{H}_2\text{O}$  ( $\text{H}_2\text{O}/\text{CH}_3\text{CN}$ , v/v); c) 2%  $\text{H}_2\text{O}$  ( $\text{H}_2\text{O}/\text{CH}_3\text{CN}$ , v/v); d) 3%  $\text{H}_2\text{O}$  ( $\text{H}_2\text{O}/\text{CH}_3\text{CN}$ , v/v); e) 4%  $\text{H}_2\text{O}$  ( $\text{H}_2\text{O}/\text{CH}_3\text{CN}$ , v/v); f) 5%  $\text{H}_2\text{O}$  ( $\text{H}_2\text{O}/\text{CH}_3\text{CN}$ , v/v).  $\lambda_{\text{ex}} = 343 \text{ nm}$ .

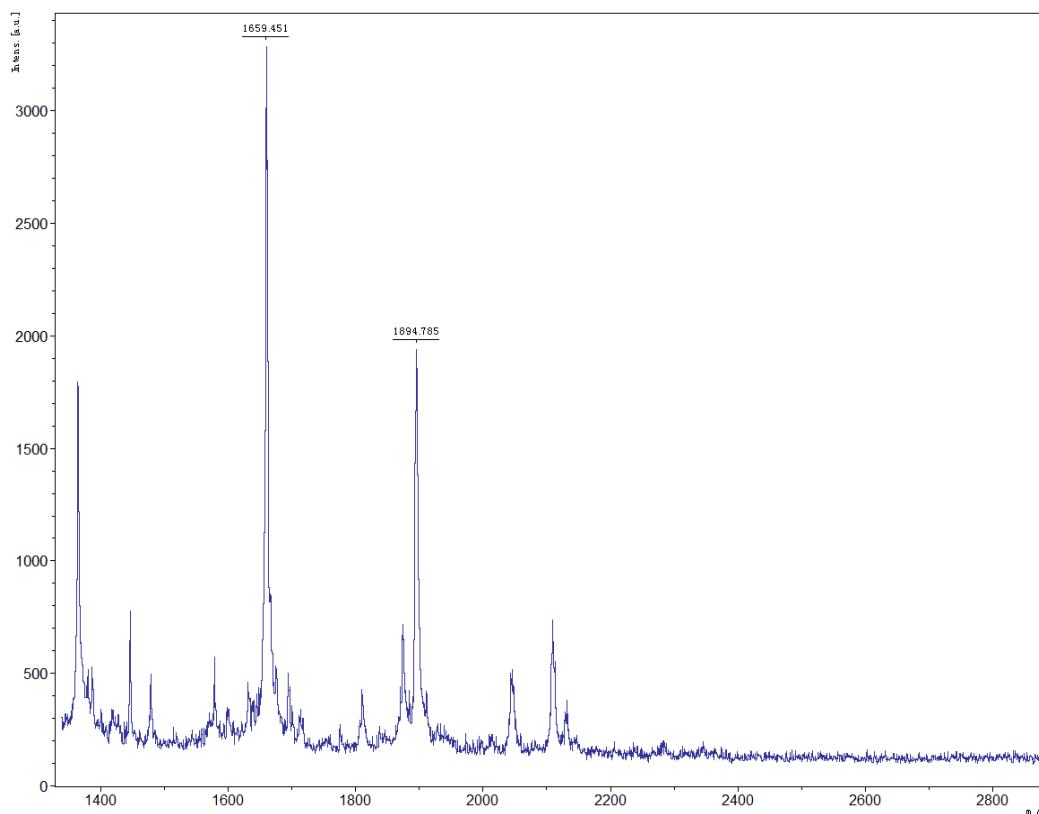

**Figure S8.** Matrix assisted laser desorption ionization time of flight mass spectrometry (MALDI-TOF) of **L**:  $[\text{L} + \text{Hg}^{2+} + 3\text{H}_2\text{O} + \text{H}]^+$ ,  $m/z$  1894.785.

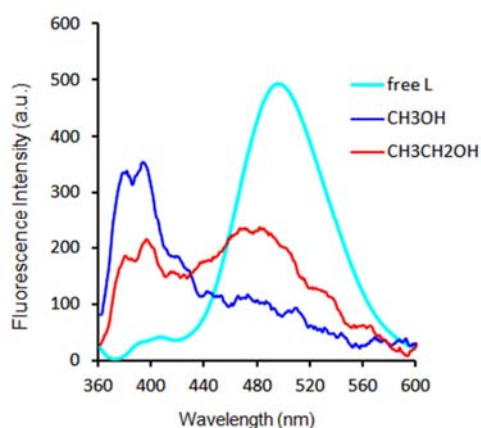

**Figure S9.** Fluorescence spectral changes of **L**-Hg<sup>2+</sup> (**[L]**=1.0  $\mu$ M, **[L]**: [Hg<sup>2+</sup>]= 1:50) in CH<sub>3</sub>CN solution upon addition 5% of CH<sub>3</sub>OH, CH<sub>3</sub>CH<sub>2</sub>OH, respectively, and determined after 48 h.

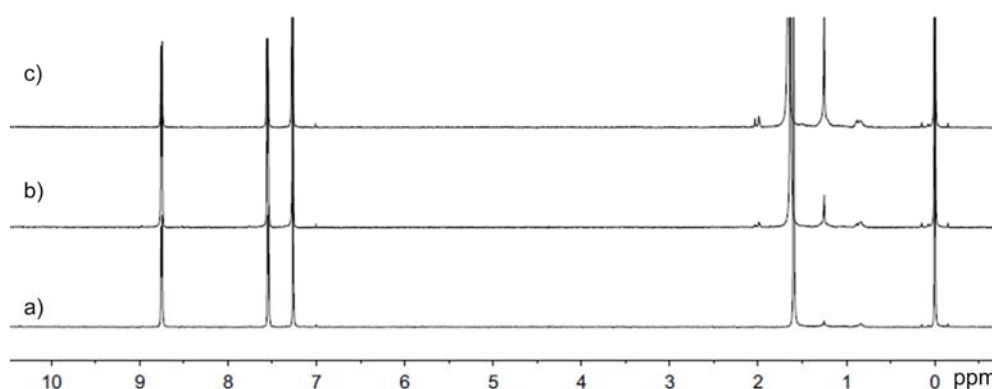

**Figure S10.** <sup>1</sup>H NMR spectral of 4,4'-bipyridine (3.0 mM) in the presence of different concentration of Hg(ClO<sub>4</sub>)<sub>2</sub> a) free 4,4'-bipyridine, b) upon addition of 0.5 equiv of Hg(ClO<sub>4</sub>)<sub>2</sub>, c) upon addition of 1.0 equiv of Hg(ClO<sub>4</sub>)<sub>2</sub> at 298 K.

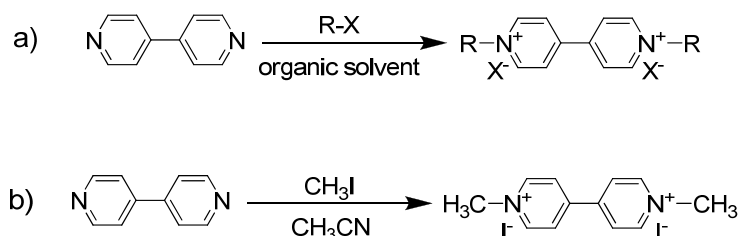

**Figure S11.** a) General chemical reaction based on 4,4'-bipyridine; b) representative of chemical reaction of 4,4'-bipyridine was selected in the present study.

Detail experiment procedure for reaction (b): CH<sub>3</sub>I (284 mg, 2 mmol) was added to a 10 mL CH<sub>3</sub>CN solution of 4,4'-bipyridine (156 mg, 1 mmol) and heated under 35 °C. During the reaction procedure, the reaction mixture was drawing 3  $\mu$ L by a syringe to 3 mL of **L**-Hg<sup>2+</sup> solution (1.0  $\mu$ M of **L** with 50 equiv of Hg<sup>2+</sup> in CH<sub>3</sub>CN solution) in a cuvette after 1h, 2h, 3h, respectively, and then determined by fluorescence spectral immediately. The increasing monomer emission intensity of **L**-Hg<sup>2+</sup> decreased with the reaction time increasing, which indicated that 4,4'-bipyridine was consumed dramatically after 3 h later (Figure S12).

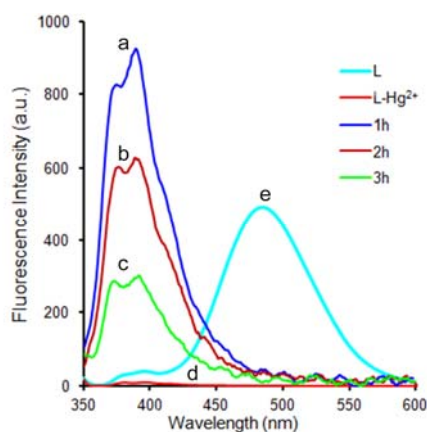

**Figure S12.** Fluorescence spectral changes of  $\text{L-Hg}^{2+}$  ( $1.0 \mu\text{M}$  of  $\text{L}$  with 50 equiv of  $\text{Hg}^{2+}$  in  $\text{CH}_3\text{CN}$  solution) upon addition of the reaction mixture of 4,4'-bipyridine after a) 1h; b) 2h; c) 3h. at 298 K.  $\lambda_{\text{ex}} = 343 \text{ nm}$ .

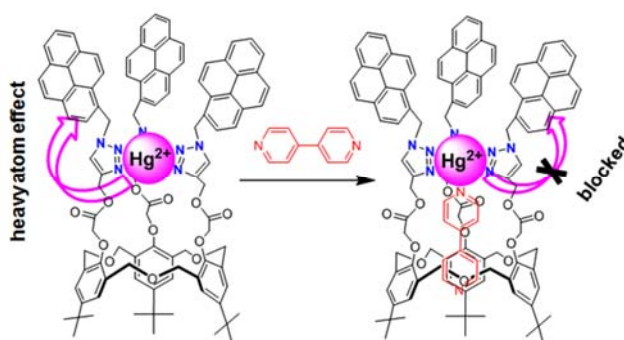

**Figure S13.** Plausible mechanism of heavy atom effect blocked by 4,4'-bipyridine in  $\text{L-Hg}^{2+}$  complex.

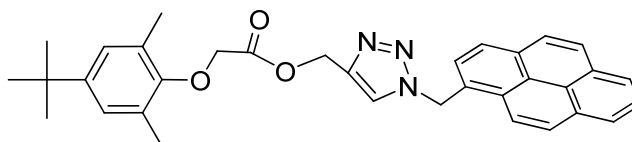

**Figure S14.** Molecular structure of **M**.

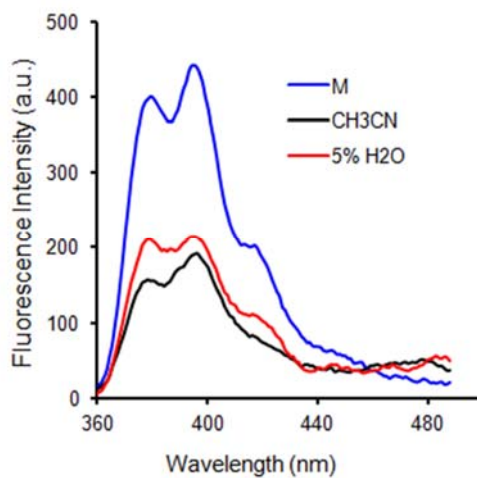

**Figure S15.** Fluorescence spectral changes of **M** ( $1.0 \mu\text{M}$ ) upon addition of 50 equiv. of  $\text{Hg}(\text{ClO}_4)_2$  in  $\text{CH}_3\text{CN}$  and  $\text{H}_2\text{O}/\text{CH}_3\text{CN}$  (v/v, 5:95) solution, respectively at 298K, and determined immediately at 298 K.  $\lambda_{\text{ex}} = 343 \text{ nm}$ .

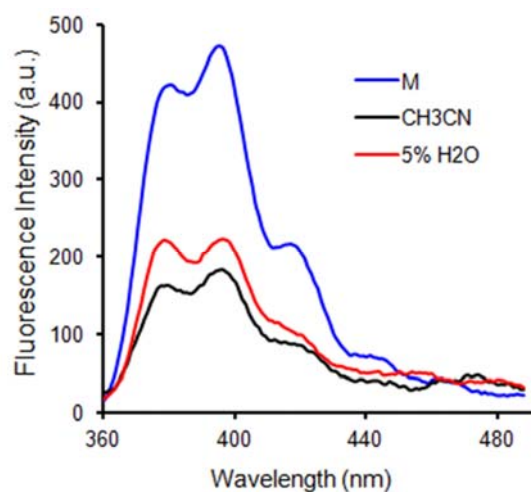

**Figure S16.** Fluorescence spectral changes of **M** ( $1.0 \mu\text{M}$ ) upon addition of 50 equiv. of  $\text{Hg}(\text{ClO}_4)_2$  in  $\text{CH}_3\text{CN}$  and  $\text{H}_2\text{O}/\text{CH}_3\text{CN}$  (v/v, 5:95) solution, respectively at 298K, and determined after 48 h at 298 K.  $\lambda_{\text{ex}} = 343 \text{ nm}$ .

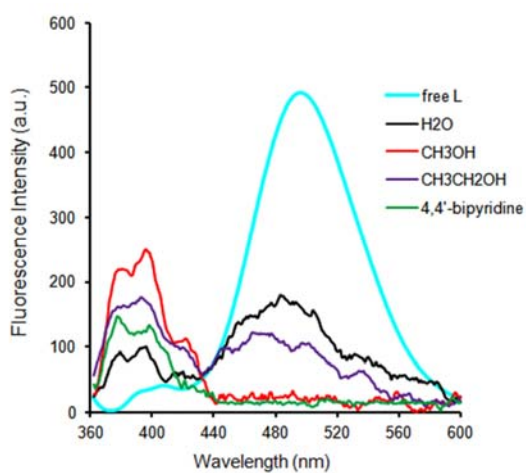

**Figure S17.** Fluorescence spectral changes of **L**- $\text{Cu}^{2+}$  ( $[\text{L}] = 1.0 \mu\text{M}$ ,  $[\text{L}]: [\text{Cu}^{2+}] = 1:50$ ) in  $\text{CH}_3\text{CN}$  solution upon addition 5% of  $\text{H}_2\text{O}$ ,  $\text{CH}_3\text{OH}$ ,  $\text{CH}_3\text{CH}_2\text{OH}$  and 20 equiv of 4,4'-bipyridine, respectively, and then determined after 48 h.
